# Supplementary material
Source: Royal Society of Chemistry journal article supplement (doi:10.1039/d6tc01096b)
Supplement: d6tc01096b1.pdf [file d6tc01096b1.pdf]

## Supporting Information

### **1532 nm-driven multimode optical thermometry within biological window enabled by Er<sup>3+</sup> self-sensitized upconversion luminescence**

Guotao Xiang<sup>1,2,3,4,\*</sup>, Yu Zhang<sup>1</sup>, Hongdou Chen<sup>1</sup>, Zhiyu Yang<sup>1,2,3</sup>, Yongjie Wang<sup>1,2,3</sup>, Lu Yao<sup>1,2,3</sup>, Sha Jiang<sup>1,2,3</sup>, Ying Chang<sup>1,2,3,\*</sup>, Hongchao Tian<sup>1</sup>, Xianju Zhou<sup>1,2,3</sup>, Li Li<sup>1,2,3</sup>, Xiaojun Wang<sup>6</sup> and Jiahua Zhang<sup>5,\*</sup>

<sup>1</sup> *School of Electronic Science and Engineering, Chongqing University of Posts and Telecommunications, 2 Chongwen Road, Chongqing 400065, China*

<sup>2</sup> *Chongqing Key Laboratory of Dedicated Quantum Computing and Quantum Artificial Intelligence, 2 Chongwen Road, Chongqing 400065, China*

<sup>3</sup> *Chongqing Key Laboratory of Quantum Artificial Intelligence and New Materials, 2 Chongwen Road, Chongqing 400065, China*

<sup>4</sup> *Key Laboratory of Big Data Intelligent Computing, Chongqing University of Posts and Telecommunications, 2 Chongwen Road, Chongqing 400065, China*

<sup>5</sup> *State Key Laboratory of Luminescence and Applications, Changchun Institute of Optics, Fine Mechanics and Physics, Chinese Academy of Sciences, 3888 Eastern South Lake Road, Changchun 130033, China*

<sup>6</sup> *Department of Physics & Astronomy, Georgia Southern University, Statesboro, Georgia 30460, U.S.A.*

*Corresponding Authors:* Dr. Guotao Xiang; *Email address:* [xianggt@cqupt.edu.cn](mailto:xianggt@cqupt.edu.cn)

Dr. Jiahua Zhang; *Email address:* [zhangjh@ciomp.ac.cn](mailto:zhangjh@ciomp.ac.cn)

Dr. Ying Chang; *Email address:* [changying@cqupt.edu.cn](mailto:changying@cqupt.edu.cn)

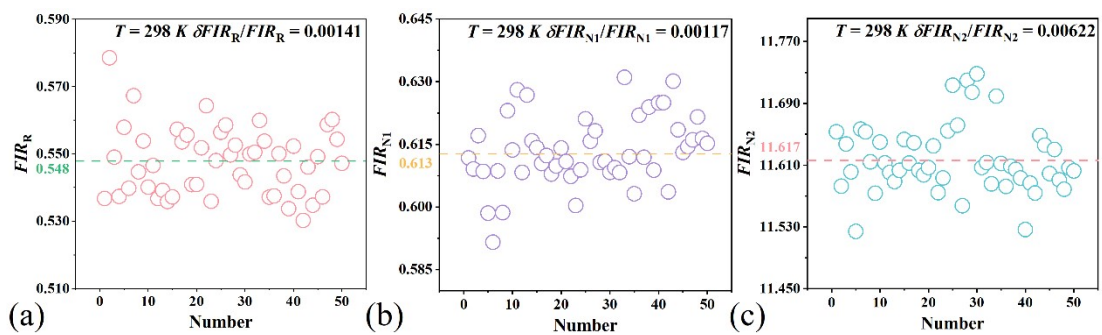

**Figure S1** (a)  $FIR_R$ , (b)  $FIR_{N1}$  and (c)  $FIR_{N2}$  values obtained from 50 times' repeated spectral measurement at 298 K.

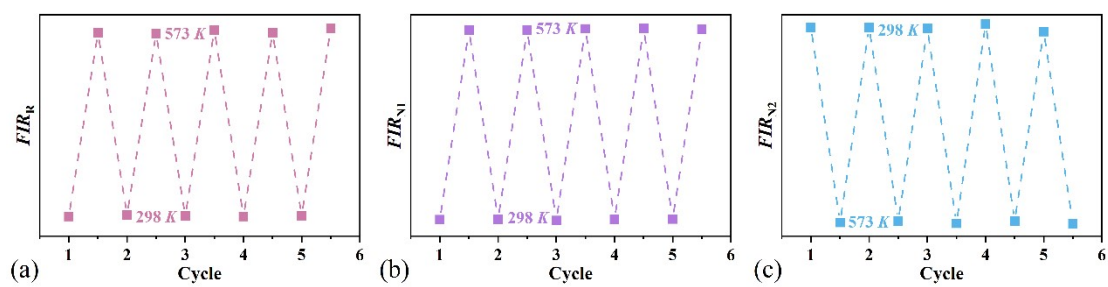

**Figure S2** Repeatability studies of  $FIR_R$  along with  $FIR_{N1}$  and  $FIR_{N2}$  from 298 K to 573 K.
